# Supplementary material for: High-performance Ruddlesden–Popper perovskite oxide with in situ exsolved nanoparticles for direct CO2 electrolysis
Source: Royal Society of Chemistry journal article supplement (doi:10.1039/d3ta04122k), 2023-01-01
Supplement: d3ta04122k1.pdf [file d3ta04122k1.pdf]

# High-performance Ruddlesden-Popper perovskite oxide with *in-situ* exsolved nanoparticles for direct CO<sub>2</sub> electrolysis

Ka-Young Park, Taehee Lee, Wanhua Wang, Haixia Li, and Fanglin Chen\*

<sup>a</sup> Department of Mechanical Engineering, University of South Carolina, Columbia, SC 29208

\* Corresponding author's contact information:  
[chenfa@cec.sc.edu](mailto:chenfa@cec.sc.edu)

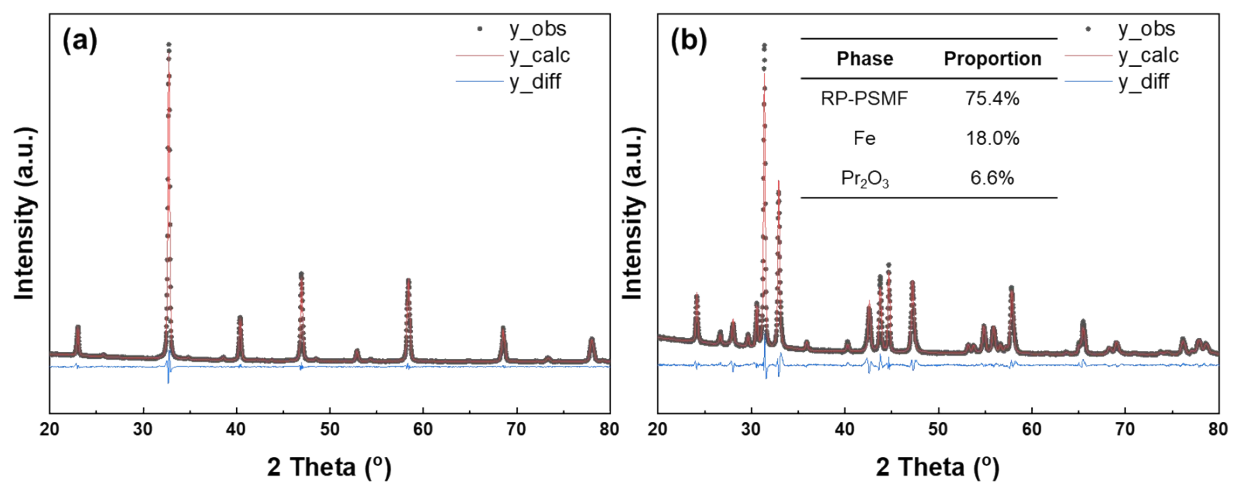

Figure S1. Rietveld refinement for XRD spectra fitted with observed ( $y_{obs}$ ) and calculated ( $y_{calc}$ ) XRD patterns, and the difference ( $y_{diff}$ ) between the  $y_{obs}$  and  $y_{calc}$ : (a) PSMF and (b) RP-PSMF

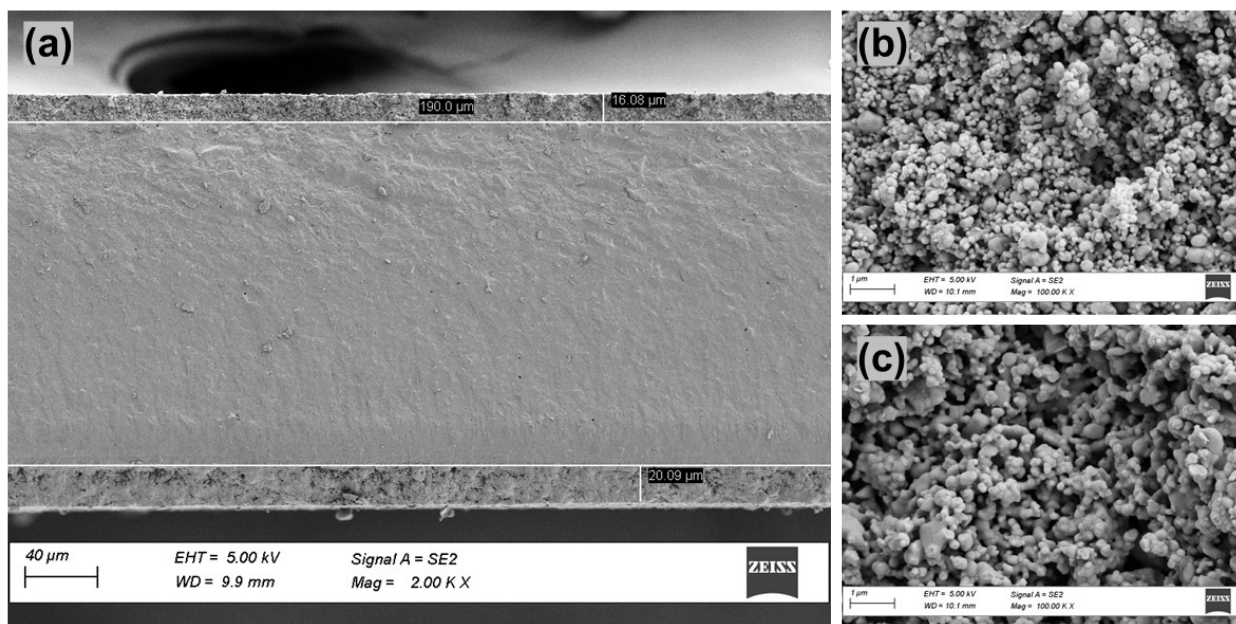

Figure S2. The SEM images of the LSGM electrolyte-supported cell (Configuration: PSMF-GDC | LSGM | LSCF-GDC) for direct CO<sub>2</sub> electrolysis operation: (a) cross-sectional image of the single cell, (b) LSCF-GDC, and (c) PSMF-GDC layers

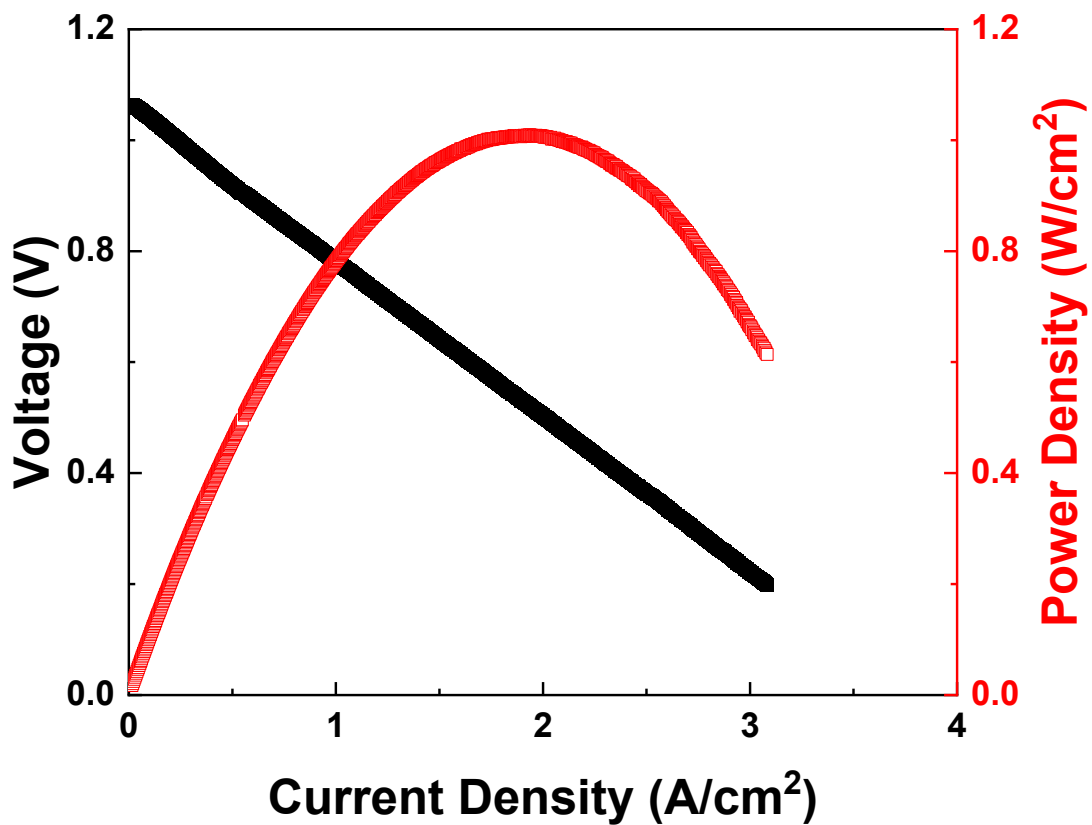

Figure S3. The current-voltage ( $I$ - $V$ ) polarization curve of the LSGM electrolyte-supported cell (Configuration: PSMF-GDC | LSGM | LSCF-GDC) at 800°C while feeding H<sub>2</sub> to fuel electrode and exposing ambient air to air electrode.

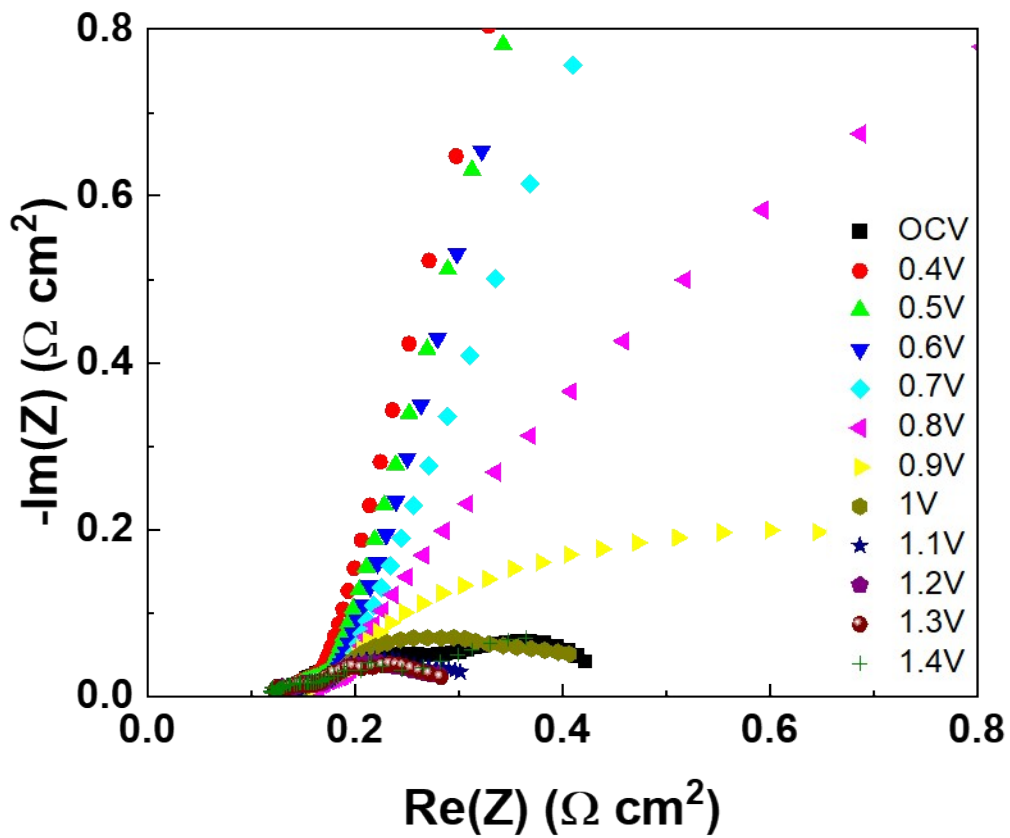

Figure S4. The EIS spectra of the LSGM electrolyte-supported cell (Configuration: PSMF/GDC | LSGM | LSCF/GDC) at 800°C under various applied voltages from OCV to 1.4V.

Table S1. The results of XPS fitting for the Fe 2P<sub>3/2</sub> and Mn 2P<sub>3/2</sub> peaks

| PSMF<br>Fe 2P <sub>3/2</sub> ( $\chi^2 = 0.95$ ) |              |          |          | RP-PSMF<br>Fe 2P <sub>3/2</sub> ( $\chi^2 = 1.38$ ) |              |          |          |
|--------------------------------------------------|--------------|----------|----------|-----------------------------------------------------|--------------|----------|----------|
| Peak                                             | Position(eV) | Area (%) | FWHM(eV) | Peak                                                | Position(eV) | Area (%) | FWHM(eV) |
| Fe <sup>0</sup>                                  | -            | -        | -        | Fe <sup>0</sup>                                     | 705.9        | 20.6     | 3.0      |
| Fe <sup>2+</sup>                                 | 709.4        | 29.9     | 2.5      | Fe <sup>2+</sup>                                    | 709.4        | 46.5     | 3.2      |
| Fe <sup>3+</sup>                                 | 710.7        | 46.4     | 2.8      | Fe <sup>3+</sup>                                    | 710.7        | 32.9     | 3.3      |
| Fe <sup>4+</sup>                                 | 712.4        | 23.7     | 3.0      | Fe <sup>4+</sup>                                    | -            | -        | -        |

  

| PSMF<br>Mn 2P <sub>3/2</sub> ( $\chi^2 = 1.56$ ) |              |          |          | RP-PSMF<br>Mn 2P <sub>3/2</sub> ( $\chi^2 = 1.83$ ) |              |          |          |
|--------------------------------------------------|--------------|----------|----------|-----------------------------------------------------|--------------|----------|----------|
| Peak                                             | Position(eV) | Area (%) | FWHM(eV) | Peak                                                | Position(eV) | Area (%) | FWHM(eV) |
| Mn <sup>2+</sup>                                 | -            | -        | -        | Mn <sup>2+</sup>                                    | 640.4        | 53.9     | 3.6      |
| Mn <sup>3+</sup>                                 | 641.4        | 27.8     | 2.7      | Mn <sup>3+</sup>                                    | 641.4        | 46.1     | 3.2      |
| Mn <sup>4+</sup>                                 | 642.1        | 72.2     | 2.9      | Mn <sup>4+</sup>                                    | -            | -        | -        |
